# Supplementary material
Source: PubMed Central journal article supplement (PMC4964279)
Supplement: NIHMS762154-supplement-Supplemental_Material.pdf [file NIHMS762154-supplement-Supplemental_Material.pdf]

## Supplementary Material

### **Supplemental Figure 1. AbYsis database search and analysis.**

Page 1 shows the first 50 sequences (of 2676) are shown, including the full length sequence followed by the FR1 sequence (defined using Chothia numbering system).

Pages 2 and 3 show the python script used to process and analyze FR1 sequences and the output from running the script.

Pages 4 and 5 show the python script used to process and analyze SP sequences and the output from running the script.

Light Chain Detail  
Regions (Chothia definition)

| #  | Light Chain Protein Sequence                                | Light Chain Sequence                                         | Length |
|----|-------------------------------------------------------------|--------------------------------------------------------------|--------|
| 1  | DIQMTQSPASLSVSVEGTVTIT                                      | DIQMTQSPASLSVSVEGTVTIT                                       | 23     |
| 2  | DVMTQTPSLVSLGDAISCRSSQSLVHSGNTYLHWYLOKPGQSPKLLIYKYSNRF      | SGVPRFSGSGGDTFLTKISRVEAEDLGVYFCQSDTHVPTFFGGGTKLEIK           | 23     |
| 3  | DVMTQTPSSLSASRGRVITISASQATSKYLNWYQKPDGTVKLLINYSRHSVGPS      | RFGSGSGDTYSLTISNLEPEDIATYYCQQYNKLPYFFGGGTKLEIK               | 23     |
| 4  | DVMTQSHKFMSTVGDVRSIICAKASQDVGTAVDWYQKPGQSPKLLIYASNRHTGVPD   | RFTGSGGDTFLTAINVQSEDLADYFCQQYNSYPLTFAGGTKLEIK                | 23     |
| 5  | SIVMTQPKFLPVSAGDRVTMTKASQVGNWVAWYQKPGQSPKLLIYASNRHTGVPD     | RFTGSGGDTFTIISNVOSEDLADYFCQQYNSYSPWTFGGGTKLEIK               | 23     |
| 6  | ARCELVMTQSPASLIVTIGKVTTCISNTDIDDLNMQSKAGEPKLLISEGNLFSFG     | PFTGSSGNGTDFVFTLENTLEDVANNYCFQSDNMPFFGSGTKLEIKRADAAPT        | 23     |
| 7  | MSSAQFLGLLLCFQGRCDIQMTQTPSSLSASLGRDVTVSCRASQDINNYLNWYQKPD   | GTVKLLMYTSLKHSVGRSFRSGSGGDTYSLTISNLEQEDIATYFCQQGNTLPWTFGGG   | 23     |
| 8  | ELVLTQSPALMSASPEKVTMTCRASVSYMHWYQKPGSPKRWIYDTSKLAGVPR       | FSGSGGTSYSLTISNLEAEDAATYYCQWSSDPPTFFGGTKLEIK                 | 23     |
| 9  | QIVLTQSPAIMSASPEKVTMTCSASSVSYMHWYQKSGTSPKRWIYDTSKLAGVPR     | FSGSGGTSYSLTISNLEAEDAATYYCQWSSXPPPTFFGGTKLEIKR               | 23     |
| 10 | MRAPAIFGLLLPFGTRCDIQMTQSPSSLSASLGERVLSLTKRASQDQIGSKLWMLQEP  | DTFKRLIYATSLSDGVPKRFSGRSDGSDYSLTISSELEDFDYVYCYQYASSPYTFFG    | 23     |
| 11 | DVMTQTPSLVSLGDAISCRSSQSLVHSGNTYLHWYLOKPGQSPKLLIYKYSNRF      | SGVPRFSGSGGDTFLTKISRVEAEDLGVYFCQSDTHVPTFFGGGTKLEIKRADAAPT    | 23     |
| 12 | DIVLTQSPASLAVSLGQRATISCRASKSVSTGYSLHWYQKPGQSPKLLIYASNLSESG  | VPARFSGSGGDTFLTINHPVEEEDAATYYCQHSRELPFTFAGGTKLEIK            | 23     |
| 13 | MDFQVQISFLLISVTRGEIVLTQSPAITAASLQKVTITCSASSVSYMHWYQKQKSG    | TSPKPIYETSKLAVGPARFSGSGGTSYSLTISNLEAEDAATYYCQWNYPLITFFGAG    | 23     |
| 14 | DIQLTQSPAIMSASPEKVTMTCSASSVSYMHWYQKSGTSPKRWIYDTSKLAGVPR     | FSGSGGTSYSLTISNLEAEDAATYYCQWSSNPPYFFGGGTKLEI                 | 23     |
| 15 | ENVLQSPAIMSASPEKVTMTCSASSVSYMHWYQKPGTSPKRWIYRTSNLAPGVP      | ARFSGSGGTSYSLTISNLEAEDAATYYCQWSSGYPYFFGSGTKLEIK              | 23     |
| 16 | DIQMQSPSSLSASLGDITITICRASQINILWYQKPGNIPKLLIYKASNLHTGVPS     | RFGSGSGDTFLTISNLEPEDIATYYCLQGGSYPLTFAGGTKVELK                | 23     |
| 17 | DVMTQTPSLVSLGDAISCRSSQSLVHSGNTYLHWYLOKPGQSPKLLIYKYSNRF      | SGVPRFSGSGGDTFLTKISRVEAEDLGVYFCQSDTHVPTFFGGGTKLEIK           | 23     |
| 18 | DIVMTQSKFMSTLGDVRSVTKASQNVGNVAWYQKPGQSPKLLIYASFRYSVGPD      | RFTGSGGDTFLTINVOSEDLAEYFCHQYNSYPLTFGGGTKLEIK                 | 23     |
| 19 | MDFQVQIFSLMSASIMSRGQVLTQSPALMSASPEKVTMTCSASSVSYMHWYQKQK     | PRSSPKPIYLTNSLAVGPARFSGSGGTSYSLTISNLEAEDAATYYCQWSSNPLTFFG    | 23     |
| 20 | DIQLTQSPAIMSASPEKVTMTCRASSVSYMHWYQKPGSPKRWIYATSNLAVGPAR     | LSGSGGTSYSLTISRVEAEDAATYYCQWSSGNTPTFFGGGTKLEIKR              | 23     |
| 21 | DVMTQTPSLVSLGDAISCRSSQSLVHSGNTYLHWYLOKPGQSPKLLIYKYSNRF      | SGVPRFSGSGGDTFLTKISRVEAEDLGVYFCQSDTHVPTFFGGGTKLEIKRADAAP     | 23     |
| 22 | MSVLTQVALLLWLTGARDIQMTQSPASLSASVETVITICRASQINILWYQKQK       | GKSPDLVYAKTLAGVPRSRFSGSGGDTFLKINSLOPEDFGSYCYQHFWSTPMTFFGG    | 23     |
| 23 | DIQLTQSPAIMSASPEKVTMTCSASSVSYMHWYQKSGTSPKRWIYDTSKLAGVPR     | FSGSGGTSYSLTISNLEAEDAATYYCQWSSNPPYFFGGGTKLEI                 | 23     |
| 24 | QIVLTQSPAIMSASPEKVTMTCSASSVSNRSLHWYQKSGKPLWYRTSNLAVGVP      | ARFSGSGGTSYSLTISNLEAEDAATYYCQWSSDPPTFFGGGTKLEIK              | 23     |
| 25 | ELVMTQTPASLAVSLGQRATISCRASENVDRYGNMFWYQKAGQPKLLIYASNLSESG   | GIPARFSGSGRDTFLTINPVEADVAATYFCQRSNEVPWTFGGGTKLEIKRADAAPT     | 23     |
| 26 | ELVMTQSPASLAVSLGQSVTISCRASEYAGTSLMDWYQKPGQSPKLLIYASNVES     | GVPARFSGSGGDTFLNHPVEEDIAATYFCQSRKVPATFFGGGTKLEIKRADAAPT      | 23     |
| 27 | MDFQVQIFSLMSASIMSRGQVLTQSPALMSASPEKVTMTCRASSVSYMHWYQKQK     | SGSSPKPIYAAASNLAVGPARFSGSGGTSYSLTISRVEAEDAATYYCQWSSNPPWTFG   | 23     |
| 28 | MKPLVRLWLMFMTWTPASSDQVLTQTPSLVSLGDAISCRSSQSLVHSGNTYLHWY     | LKQPKQPKLLIYKYSNRFSGVPRFSGSGGDTFLTKISRVEAEDLGVYFCQSDTHVPT    | 23     |
| 29 | QIVLTQSPAIMSASPEKVTMTCSASSVSYMHWYQKPGTSPKRWIYDTSKLAGVPR     | FSGSGGTSYSLTISNLEAEDAATYYCQRSYPTFAGGTKLEIKR                  | 23     |
| 30 | DIVLTQSPASLAVSLGQRATISYRASKSVSTGYSLMHWYQKPGQSPKLLIYASNLSESG | GVPARFSGSGGDTFLNHPVEEEDAATYYCQHIRELTRSEGGPSWK                | 23     |
| 31 | DIQLTQSPAIMSASPEKVTMTCSASSVSYMHWYQKPGSPKRWIYATSNLAVGPAR     | FSGSGGTSYSLTISNLEAEDAATYYCQWSSPLTFAGGTKLEI                   | 23     |
| 32 | DIQMQSPKFMSTVGDVRSVTKASQNVGNVAWYQKPGQSPKLLIYASFRYSVGPD      | RFTGSGGDTFLTINVOSEDLAEYFCQQYNSYPTFFGGGTKLEIKR                | 23     |
| 33 | QIVLTQSPAIMSASPEKVTMTCSASSVSYMHWYQKPGSPKRWIYDTSKLAGVPR      | FSGSGGTSYSLTISNLEAEDAATYYCQRSYPTFAGGTKLEIKR                  | 23     |
| 34 | DIQMQSPKFMSTVGDVRSVTKASQNVGNVAWYQKPGQSPKLLIYASFRYSVGPD      | RFTGSGGDTFLTINVOSEDLAEYFCQQYNSYPTFFGGGTKLEIKR                | 23     |
| 35 | ELVMTQSPSSLSASAGEKVTMTCSASSQTLNRSRKNYLAWYQKPGQSPKLLIYASWATR | KSGVPARFSGSGGDTFLTISGVAEDLAVYCKQSYNFPFFGGGTKLEIKRADAAPT      | 23     |
| 36 | DIQMQSPSSMYAFLGERVITICAKSQDIYRYLWYQKPGQSPKLLIYASNRHLDVGGPS  | RFGSGGQDYSLTISSELEDMGIYCYCLQYDEFPFTFGGTKLEIK                 | 23     |
| 37 | DIQMTQTPSSLSASLGRDVTISCRASQDINNYLNWYQKPDGTVKLLINYSRHSVGPS   | RFGSGSGDTYSLTISNLEQEDIATYFCQQGNTLPRTFFGGGTKL                 | 23     |
| 38 | DVMTQTPSLVSLGDAISCRSSQSLVHSGNTYLHWYLOKPGQSPKLLIYKYSNRF      | SGVPRFSGSGGDTFLTKISRVEAEDLGVYFCQSDTHVPTFFGGGTKLEIKR          | 23     |
| 39 | DVMTQTKFMSTVGDVRSVTKASQNVGNVAWYQKPGHSPKLLIYASFRYSVGPD       | RFTGSGGDTFLTINVOSEDLAEYFCQQYNSYPTFFGGGTKLEI                  | 23     |
| 40 | DIVITQSPSSLTVSAGEKVTMTKSSQSLNRSRKNYLAWYQKPGQSPKLLIYASWATR   | ESGVPRFSGSGGDTFLTISNVOSEDLAVYCKQSDYDLWTFGGGTKLEIKRADAAPT     | 23     |
| 41 | DIVMTQSPASLVSVEGTVTITICRASQINILWYQKPGQSPKLLIYASNRHTGVPD     | PFTGSSGNGTDFVFTLENTLEDVANNYCFQSDNMPFFGSGTKLEIKRADAAPT        | 23     |
| 42 | ETTIVTQSPASLMSIAGEKVTIRCTISDIDDDMMWYQKPGEPKLLIYASNLSESG     | RFGSGGDTFTIISNLEAEDAATYYCQWSSNPPYFFGGGTKLEIK                 | 23     |
| 43 | DIVLTQSPASLAVSLGQRATISCRASEIYGTFTMHWYQKPGQSPKLLIYASNLSESG   | GIPARFSGSGRDTFLTINPVEADVAATYYCQWSSYYP                        | 23     |
| 44 | QIVLTQSPAIMSASPEKVTMTCSASSVSYMHWYQKPGSPKRWIYDTSNLAGVPR      | FSGSGGTSYSLTISRVEAEDAATYYCQWSSYYP                            | 23     |
| 45 | DIVMTQSHKFMSTVGDVRSVTKASQNVGNVAWYQKPGQSPKLLIYASNRHTGVPD     | RFTGSGGDTFLTINVOSEDLADYFCQSDTHVPTFFGGGTKLEIK                 | 23     |
| 46 | QIVLTQSPAIMSASPEKVTMTCSASSVSYMHWYQKPGSPKRWIYDTSNLAGVPR      | CSGSGGTSYSLTISRVEAEDAATYYCQRSYPLTFAGGTKLEIKR                 | 23     |
| 47 | DVMTQTKFMSTVGDVRSVTKASQNVGNVAWYQKPGQSPKLLIYASFRYSVGPD       | RFTGSGGDTFLTINVOSEDLTEYFCQQYNGYPLTFAGGTKLEIK                 | 23     |
| 48 | DVMTQTPSLVSLGDAISCRSSQSLVHSGNTYLHWYLOKPGQSPKLLIYKYSNRF      | SGVPRFSGSGGDTFLTKISRVEAEDLGVYFCQSDTHVPTFFGGGTKLEIK           | 23     |
| 49 | MVFTQIQLGLMFLWJASRGRDVLQSPATLSVTPGDSVLSLSCRASQISNNLHWYQKQK  | HESPRLLIYASQISISGIPRFRFSGSGGDTFLTINSINSETEDEFGMYFCQQSSNWPFFG | 23     |
| 50 | QIVLTQSPAIMSASPEKVTMTCSASSVSYMHWYQKPGTSPKRWIYDTSKLAGVPR     | FSGSGGTSYSLTISRVEAEDAATYYCQRSYPTFAGGTKLEIKR                  | 23     |

```

# import file into aFile and then into aList
aFile = open('FR1_and_complete.txt', 'r')
aList = aFile.readlines()

# eliminate first four lines of junk at the beginning of file
del aList[0:4]

print("The total number of sequences in the database is:")
print(len(aList))
print(' ')

# create aGoodList with placeholders
aGoodList = [('start','start','start'), ('end','end','end')]
for i in range(len(aList)):
    aGoodList[(i):(i+1)] = [('0','0','0')]

# Populate aGoodList with the first two blocks of sequence and then
the FR1 region
for i in range(len(aList)):
    Item = aList[i]
    ItemMod = Item.split()
    aGoodList[i] = (ItemMod[1],ItemMod[2],ItemMod[-2])

# Use the set function to remove duplicates
aBetterList = list(set(aGoodList))

print("After removing duplicate sequences, there are:")
print(len(aBetterList))
print(' ')

# make new list for just the FR1 sequence
aNewList = ['start','end']
for i in range(len(aBetterList)):
    aNewList[(i):(i+1)] = ['0']

# Populate aNewList with the FR1 region sequence
for i in range(len(aBetterList)):
    Item = aBetterList[i]
    aNewList[i] = (Item[2])

# make new list with just the first 7 amino acids and eliminate any
entries that contain an X
anImprovedList = [i[0:7] for i in aNewList]
aBestList = [i for i in anImprovedList if not 'X' in i]

print("After removing all of the incomplete sequences (with an X),
there are:")
print(len(aBestList))
print(' ')

# count unique 7 amino acid FR1 entries and # of occurrences
from collections import Counter
Uniques = Counter(aBestList)
print("The number of unique 7 amino acid FR1 sequences in these 2237
mAbs:")
print(len(Uniques))
print(' ')

# Statistics
UniqueList = list(Uniques.items())
UniqueList.sort(key=lambda x: int(x[1]))
UniqueList.reverse()
print("The top 15 most frequent sequences, and their frequencies,
are:")
print(' ')
print(UniqueList[0:15])
Top15 = UniqueList[0:15]
Top15Nums = [int(x[1]) for x in Top15]
Top15Sum = sum(Top15Nums)
Top15Percent = (Top15Sum/len(aBestList))*100
print(' ')
print('Of the 2237 mAbs, the top 15 sequences account for:')
print(Top15Sum)

```

```
Python 2.7.6 (default, Sep 9 2014, 15:04:36)
[GCC 4.2.1 Compatible Apple LLVM 6.0 (clang-600.0.39)] on darwin
Type "copyright", "credits" or "license()" for more information.
```

```
>>> ===== RESTART =====
```

```
>>>
```

```
The total number of sequences in the database is:
2676
```

```
After removing duplicate sequences, there are:
2265
```

```
After removing all of the incomplete sequences (with an X), there are:
2237
```

```
The number of unique 7 amino acid FR1 sequences in these 2237 mAbs:
190
```

```
The top 15 most frequent sequences, and their frequencies, are:
```

```
[('QIVLTQS', 259), ('DIVMTQS', 231), ('DIVLTQS', 181), ('DIQLTQS',
169), ('DVVMTQT', 163), ('DIQMTQS', 155), ('DVLMTQT', 115),
('DIQMTQT', 107), ('DIELTQS', 64), ('ELVMTQS', 51), ('DIVMSQS', 50),
('EIVLTQS', 49), ('ENVLTQS', 42), ('DIKMTQS', 41), ('DIVMTQA', 37)]
```

```
Of the 2237 mAbs, the top 15 sequences account for:
1714
```

```
>>>
```

```

# import file into aFile and then into aList
aFile = open('FR1_and_complete.txt', 'r')
aList = aFile.readlines()

# eliminate first four lines of junk at the beginning of file
del aList[0:4]

print("The total number of sequences in the database is:")
print(len(aList))
print(' ')

# create anSPList with placeholders
anSPList = [('start','start','start'), ('end','end','end')]
for i in range(len(aList)):
    anSPList[(i):(i+1)] = [('0','0','0')]

# Populate anSPList with two blocks of sequence and then the 1st 10 of
SP region
for i in range(len(aList)):
    Item = aList[i]
    ItemMod = Item.split()
    S = ItemMod[1]
    SP = S[:10]
    if S[0] == 'M':
        anSPList[i] = (ItemMod[1], ItemMod[2], SP)

# and now we remove all 0's from anSPList
aGoodSPList = [i for i in anSPList if i != ('0','0','0')]

print("The total number of light chains containing SP sequence is:")
print(len(aGoodSPList))
print(' ')

# Use the set function to remove duplicates
aBetterSPList = list(set(aGoodSPList))

# make new list for just the SP sequence
aNewList = ['start','end']
for i in range(len(aBetterSPList)):
    aNewList[(i):(i+1)] = ['0']

# Populate aNewList with just the SP region sequence
for i in range(len(aBetterSPList)):
    Item = aBetterSPList[i]
    aNewList[i] = (Item[2])

# eliminate any entries that contain an X
aBestList = [i for i in aNewList if not 'X' in i]

print("After removing duplicate and incomplete sequences (with an X),
there are:")
print(len(aBestList))
print(' ')

# count unique 10 amino acid SP entries and # of occurrences
from collections import Counter
Uniques = Counter(aBestList)
print("The number of unique 10 amino acid SP sequences in these 449
mAbs:")
print(len(Uniques))
print(' ')

# Statistics
UniqueList = list(Uniques.items())
UniqueList.sort(key=lambda x: int(x[1]))
UniqueList.reverse()
print("The top 15 most frequent sequences, and their frequencies,
are:")
print(' ')
print(UniqueList[0:15])
Top15 = UniqueList[0:15]
Top15Nums = [int(x[1]) for x in Top15]
Top15Sum = sum(Top15Nums)
Top15Percent = (Top15Sum/len(aBestList))*100
print(' ')
print('Of the 449 mAbs, the top 15 sequences account for:')
print(Top15Sum)

```

```
Python 2.7.6 (default, Sep 9 2014, 15:04:36)
[GCC 4.2.1 Compatible Apple LLVM 6.0 (clang-600.0.39)] on darwin
Type "copyright", "credits" or "license()" for more information.
>>> ===== RESTART
=====
```

```
>>>
The total number of sequences in the database is:
2676
```

```
The total number of light chains containing SP sequence is:
524
```

```
After removing duplicate and incomplete sequences (with an X), there
are:
449
```

```
The number of unique 10 amino acid SP sequences in these 449 mAbs:
141
```

```
The top 15 most frequent sequences, and their frequencies, are:
```

```
[('MDFQVQIFSF', 67), ('MKLPVRLVL', 67), ('METDTLLLWV', 20),
('MMSSAQFLGL', 9), ('MSVPTQVLGL', 9), ('MDSQAQVLML', 7),
('MDMRAPAQIF', 7), ('METDTILLWV', 7), ('MVFTPQILGL', 7),
('MMSPAQFLFL', 6), ('MESQTQVLMF', 5), ('MRCLAEFLGL', 5),
('MKSQTQVFIF', 5), ('MSVLTQVLAL', 5), ('METHSQVFVY', 5)]
```

```
Of the 449 mAbs, the top 15 sequences account for:
231
>>>
```

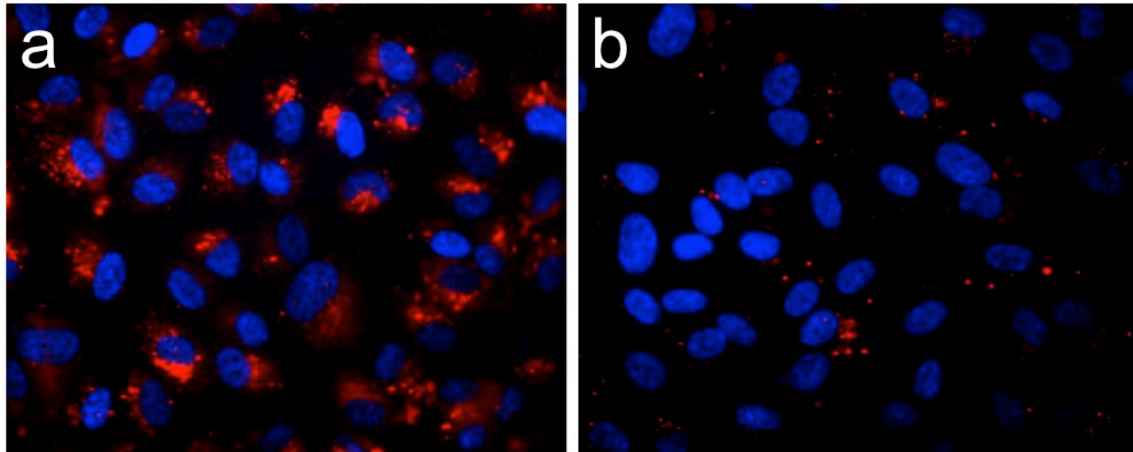

**Supplemental Figure 2. Binding of scFv-decorated liposomes to HUVEC.** (a) Ab62 scFv decorated fluoroliposomes bound to HUVEC after 30 minute incubation under static conditions. (b) Mec13 scFv decorated liposomes were used as a control for non-specific binding.
